# Supplementary material for: Morphological Changes and Component Characterization of Coffee Silverskin
Source: MDPI journal article supplement (doi:10.3390/molecules26164914), 2021-08-13
Supplement: s1 [file s1]

# Morphological Changes and Component Characterization of Coffee Silverskin

Xia Wang <sup>1,2,†</sup>, De-Fu Hong <sup>1,2,†</sup>, Gui-Lin Hu <sup>1,2,†</sup>, Zhong-Rong Li <sup>1</sup>, Xing-Rong Peng <sup>1</sup>, Qiang-Qiang Shi <sup>1</sup>  
and Ming-Hua Qiu <sup>1,2,\*</sup>

<sup>1</sup> State Key Laboratory of Phytochemistry and Plant Resources in West China, Kunming Institute of Botany, Chinese Academy of Sciences, Kunming 650201, Yunnan, China; wangxia@mail.kib.ac.cn (X.W.); hongdefu@mail.kib.ac.cn (D.-F.H.); huguili@mail.kib.ac.cn (G.-L.H.); lizhongrong@mail.kib.ac.cn (Z.-R.L.); pengxingrong@mail.kib.ac.cn (X.-R.P.); shiqiangqiang@mail.kib.ac.cn (Q.-Q.S.)

<sup>2</sup> University of Chinese Academy of Sciences, Beijing 100049, China

\* Correspondence: mhchiu@mail.kib.ac.cn; Tel.: +86-0871-6522-3327; Fax: +86-0871-6522-325

† These authors contributed equally to this work.

**Table S1.** NMR data acquisition conditions.

|                                                | Spectral width<br>(Hz) | Number of<br>scans | Empty sweep | Sampling<br>points | Sampling<br>data lattice |
|------------------------------------------------|------------------------|--------------------|-------------|--------------------|--------------------------|
| <sup>1</sup> H-NMR                             | 16025.64               | 16                 | 2           | 65536              | --                       |
| <sup>13</sup> C-NMR                            | 48076.92               | 2048               | 4           | 65536              | --                       |
| <sup>1</sup> H- <sup>13</sup> C HSQC           | 8012.82                | 8                  | 16          | --                 | 1024 × 400               |
| <sup>1</sup> H- <sup>13</sup> C HMBC           | 8012.82                | 32                 | 16          | --                 | 2048 × 400               |
| <sup>1</sup> H- <sup>1</sup> H COSY            | 8012.82                | 8                  | 16          | --                 | 2048 × 400               |
| <sup>1</sup> H- <sup>13</sup> C HSQC-<br>TOCSY | 8012.82                | 32                 | 16          | ---                | 2048 × 400               |

**Table S2.** Comparison between the compounds from unroasted (B) and roasted (A) coffee silverskin aqueous extracts.a.

| Compound                    | Characteris-<br>tic<br>Peak (ppm) | Number<br>of protons | Integral value |              | Relative content (%) |      | Rate of change (%) |
|-----------------------------|-----------------------------------|----------------------|----------------|--------------|----------------------|------|--------------------|
| Sample                      | —                                 | —                    | As             | Bs           | A                    | B    | (As-Bs)/Bs×100%    |
| <b>Total integral value</b> | —                                 | —                    | <b>11.90</b>   | <b>21.90</b> | —                    | —    | <b>− 45.6</b>      |
| <b>TSP</b>                  | <b>0</b>                          | <b>9</b>             | <b>1.00</b>    | <b>1.00</b>  | —                    | —    | —                  |
| Carbohydrate                | —                                 | —                    | 9.17           | 19.09        | 77.1                 | 87.2 | −52.0              |
| Caffeine                    | 7.85                              | 1                    | 1.05 ± 0.02    | 1.04 ± 0.04  | 8.8                  | 4.7  | + 1.0              |
| Trigonelline                | 4.42                              | 3                    | 3.46 ± 0.01    | 3.65 ± 0.03  | 9.7                  | 5.6  | − 5.2              |
| 5-chlorogenic acid          | 6.34                              | 1                    | 0.53 ± 0.03    | 0.55 ± 0.03  | 4.4                  | 2.5  | − 3.6              |
| Sucrose                     | 5.41                              | 1                    | 1.22 ± 0.03    | 2.63 ± 0.05  | 10.2                 | 12.0 | − 53.6             |
| α-D-glucopyranose           | 5.22                              | 1                    | 0.94 ± 0.06    | 2.17 ± 0.02  | 7.9                  | 9.9  | − 56.7             |
| β-D-glucopyranose           | 4.64                              | 1                    | 1.72 ± 0.06    | 3.43 ± 0.05  | 14.5                 | 15.7 | − 49.8             |
| β-D-pyranose                | 3.99                              | 1                    | 4.13 ± 0.03    | 8.48 ± 0.12  | 34.8                 | 38.7 | − 51.3             |
| β-D-fructofuranose          | 4.11                              | 2                    | 2.31 ± 0.09    | 4.76 ± 0.12  | 9.7                  | 10.9 | − 51.5             |

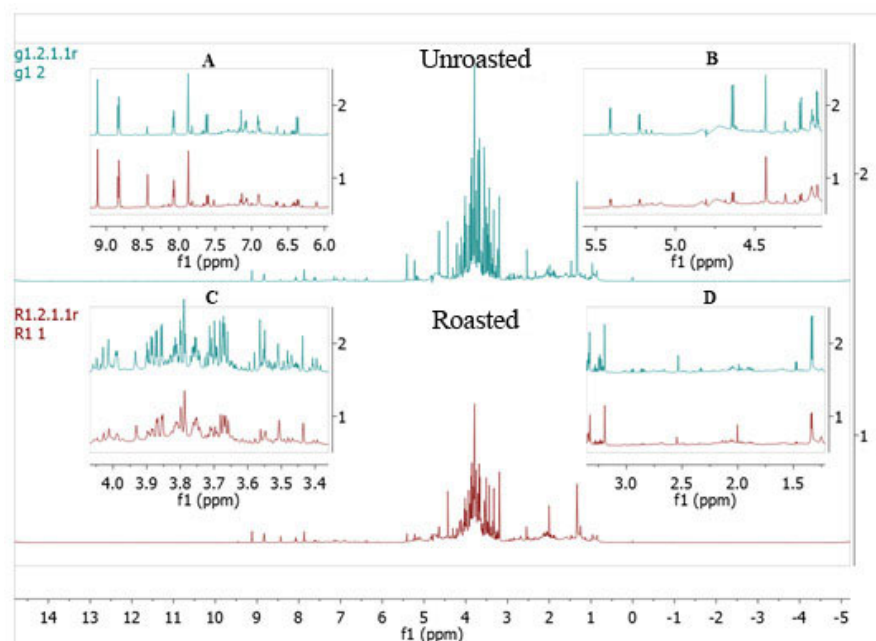

**Figure S1.** The comparison of  $^1\text{H}$  NMR spectra between unroasted B1 (up) and lightly roasted A1 (down) CS aqueous extracts. Roasted and unroasted CS are similar in chemical composition, but the total content of unroasted CS is higher than roasted CS.

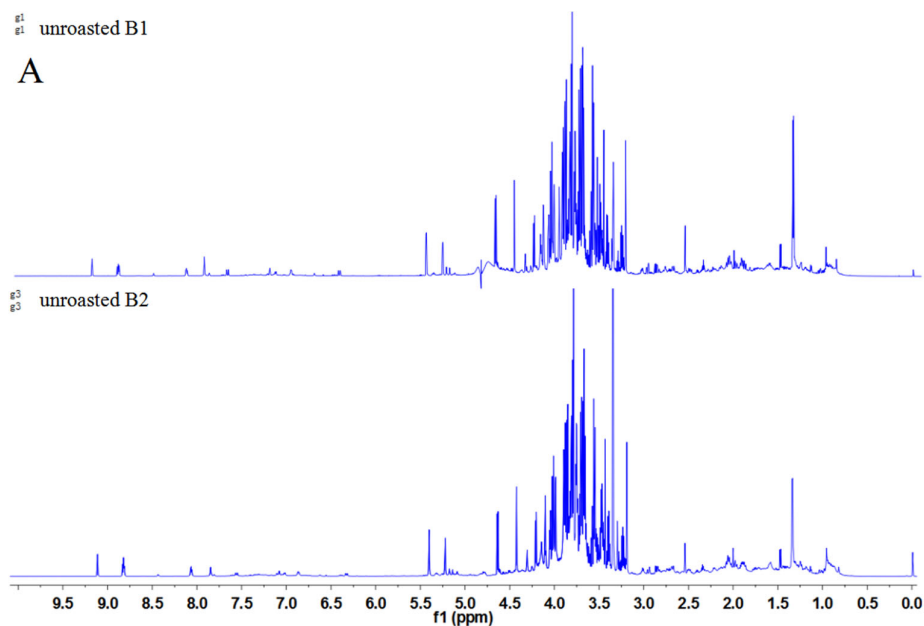

<sup>R1</sup>  
<sup>R1</sup> lightly roasted A1

B

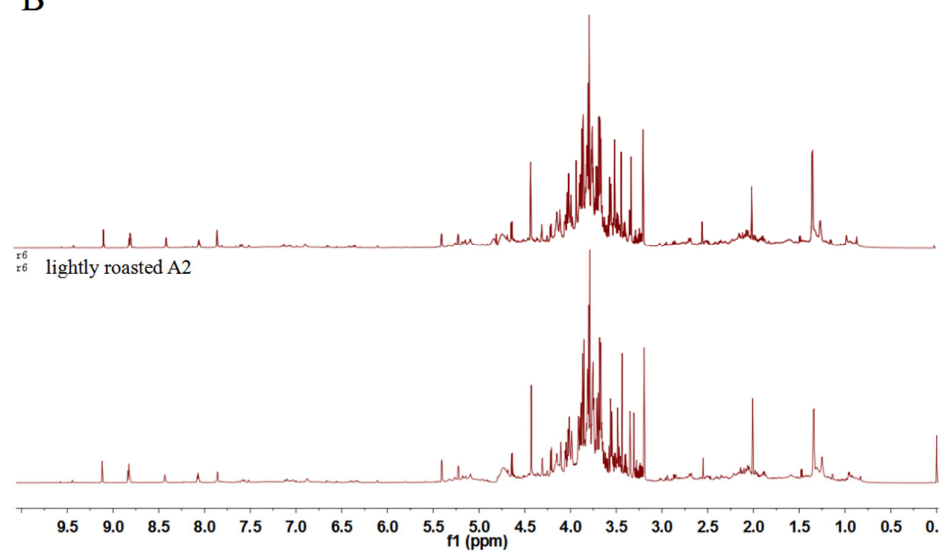

**Figure S2.** <sup>1</sup>H NMR spectrum signal of unroasted CS and lightly roasted aqueous extracts.

A

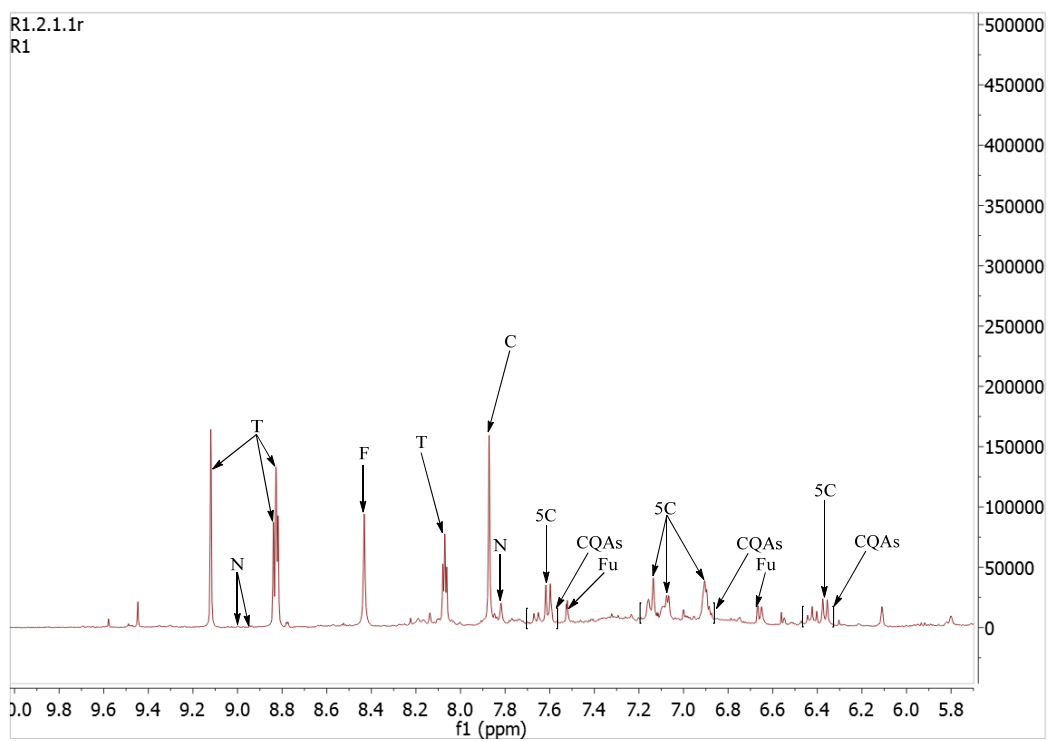

B

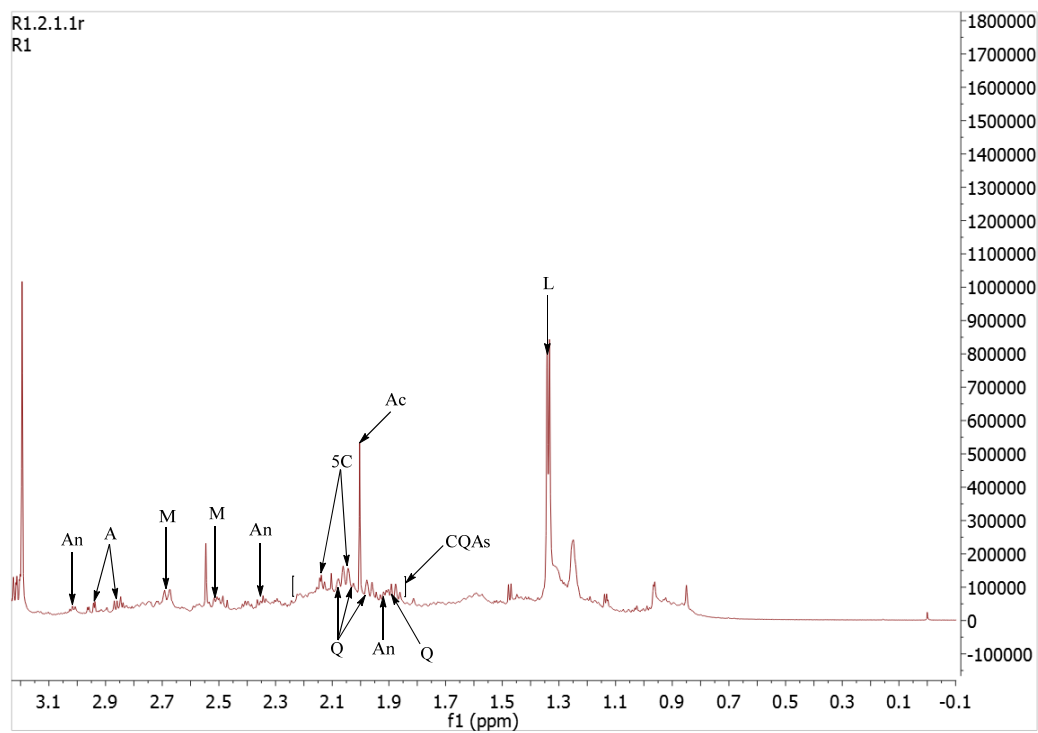

C

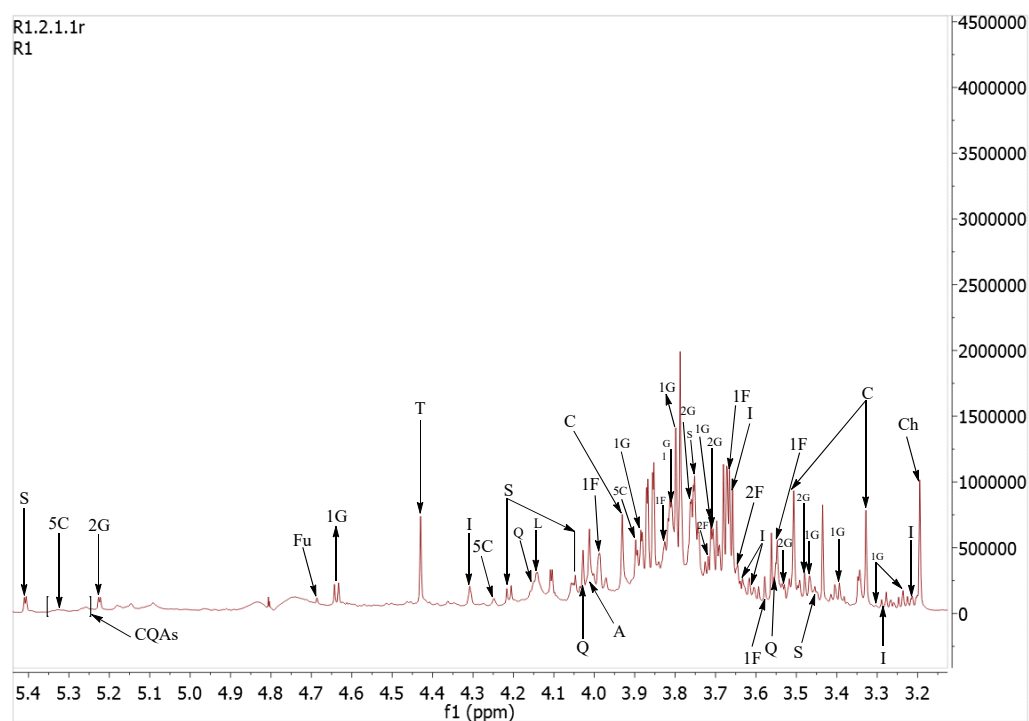

**Figure S3.**  $^1\text{H}$  NMR spectrum signal identification of lightly roasted A1 CS aqueous extracts (A-C). caffeine (C), trigonelline (T), quinic acid (Q),  $\beta$ -D-glucopyranose (1G),  $\beta$ -D-fructofuranose (1F), inositol (I), nicotinic acid (N), asparagine (A), choline (Ch), glycine (Gl), formic acid (F), 5-caffeoylquinic acid (5C),  $\alpha$ -D-glucopyranose (2G),  $\beta$ -D-fructopyranose (2F), sucrose (S), 2-furanylmethanol (Fu), malic acid (M), 4-Amino-N-butyric acid (An), lactic acid (L), acetic acid (Ac).

A

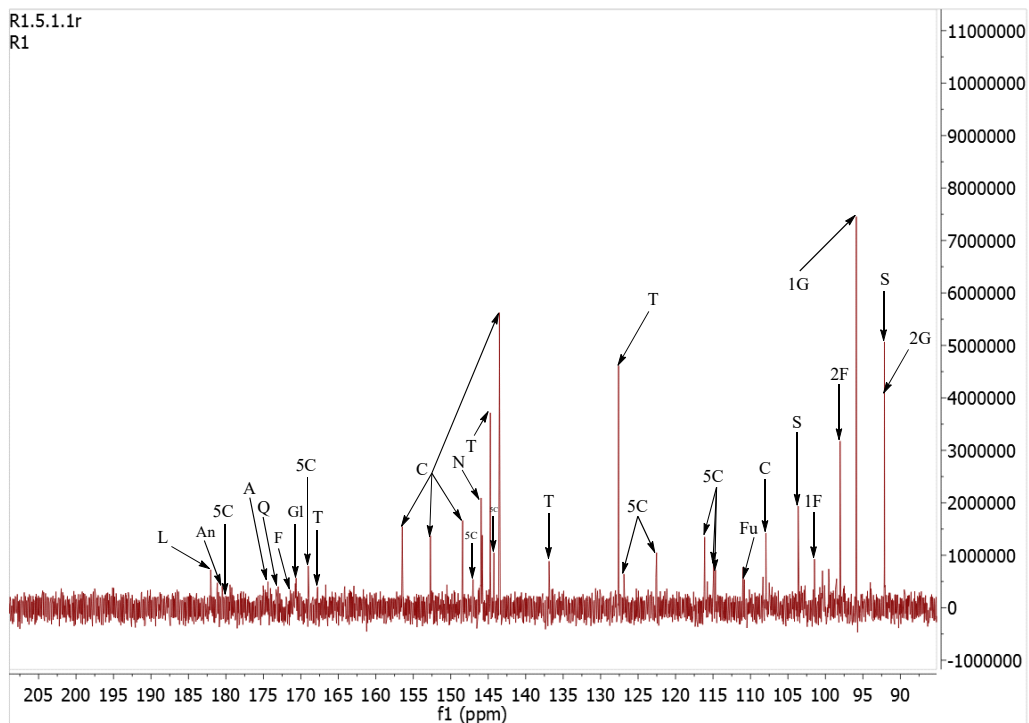

B

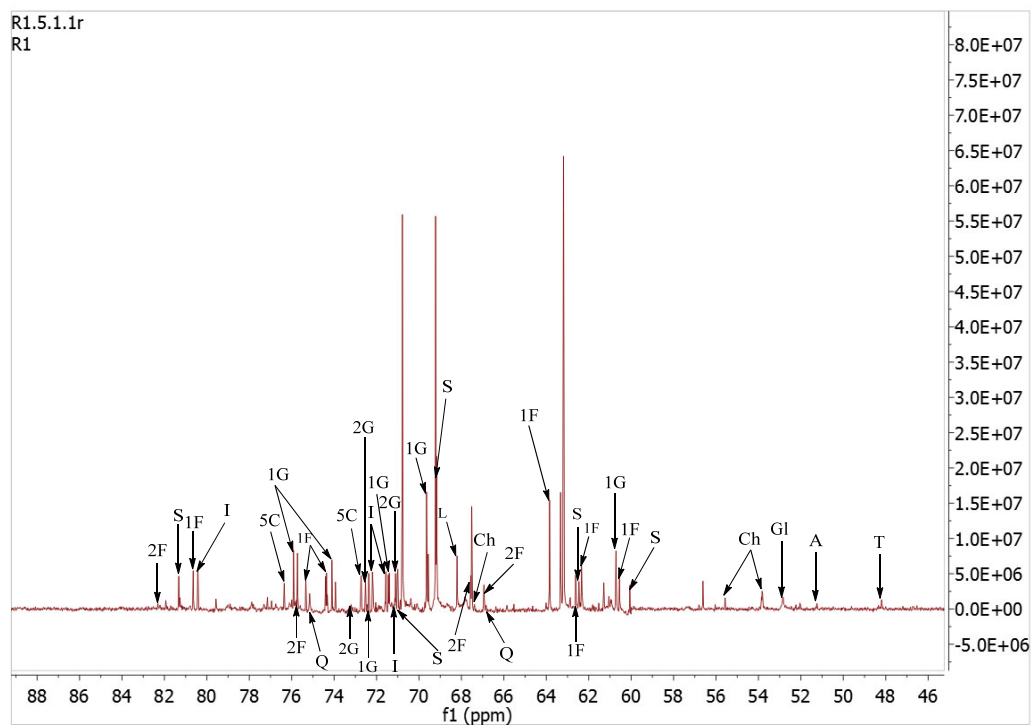

C

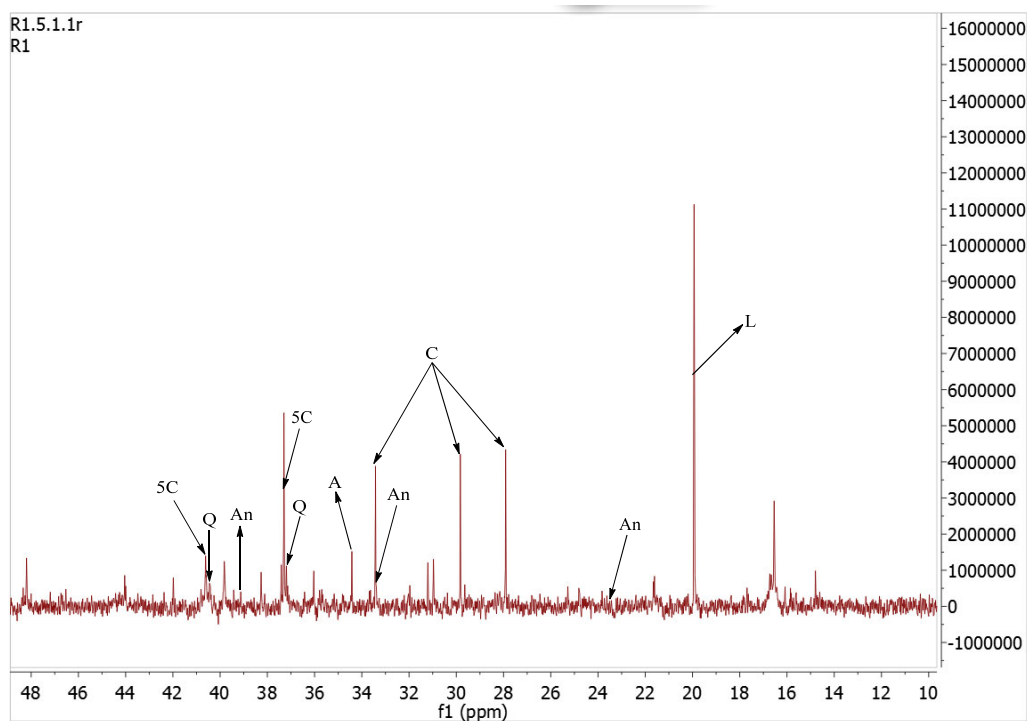

**Figure S4.**  $^{13}\text{C}$  NMR spectrum signal identification of lightly roasted A1 CS aqueous extracts (A-C). caffeine (C), trigonelline (T), quinic acid (Q),  $\beta$ -D-glucopyranose (1G),  $\beta$ -D-fructofuranose (1F), inositol (I), nicotinic acid (N), asparagine (A), choline (Ch), glycine (Gl), formic acid (F), 5-caffeoylquinic acid (5C),  $\alpha$ -D-glucopyranose (2G),  $\beta$ -D-fructopyranose (2F), sucrose (S), 2-furanylmethanol (Fu), malic acid (M), 4-Amino-N-butyric acid (An), lactic acid (L), acetic acid (Ac).

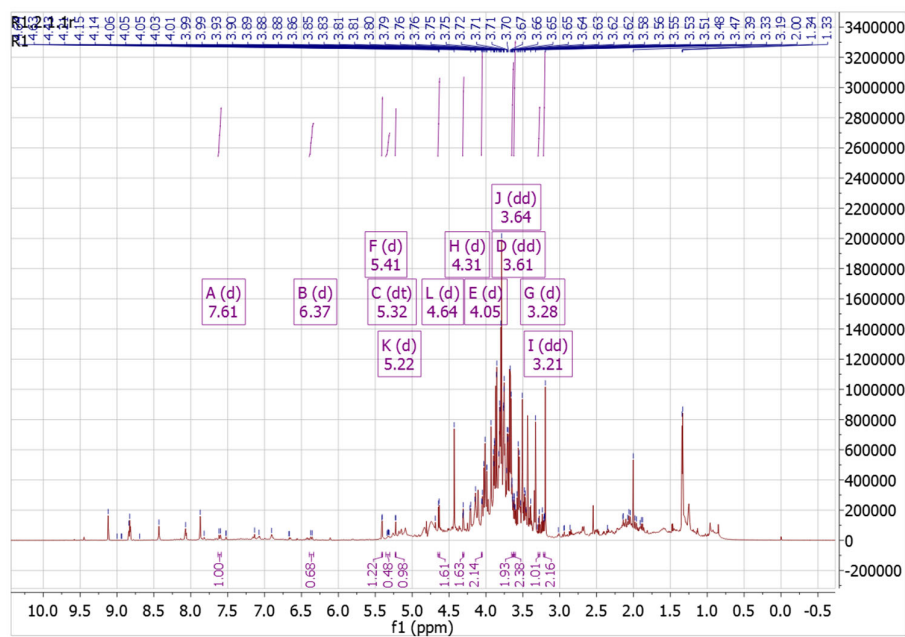

**Figure S5.**  $^1\text{H}$  NMR spectrum of lightly roasted A1 CS aqueous extracts.

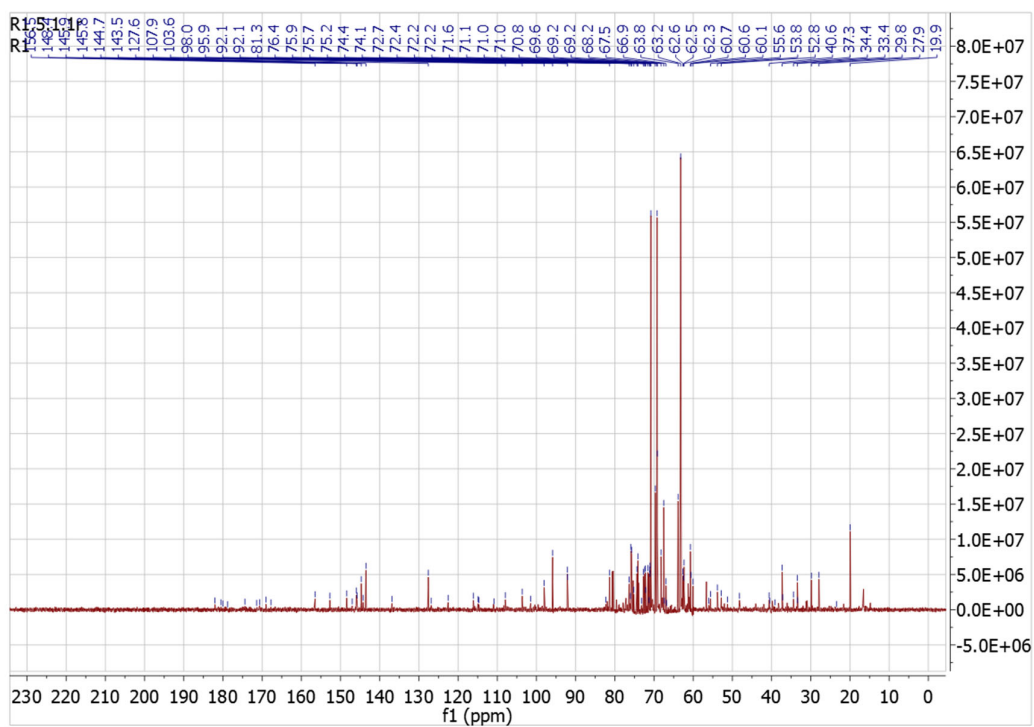

**Figure S6.**  $^{13}\text{C}$  NMR spectrum of lightly roasted A1 CS aqueous extracts.

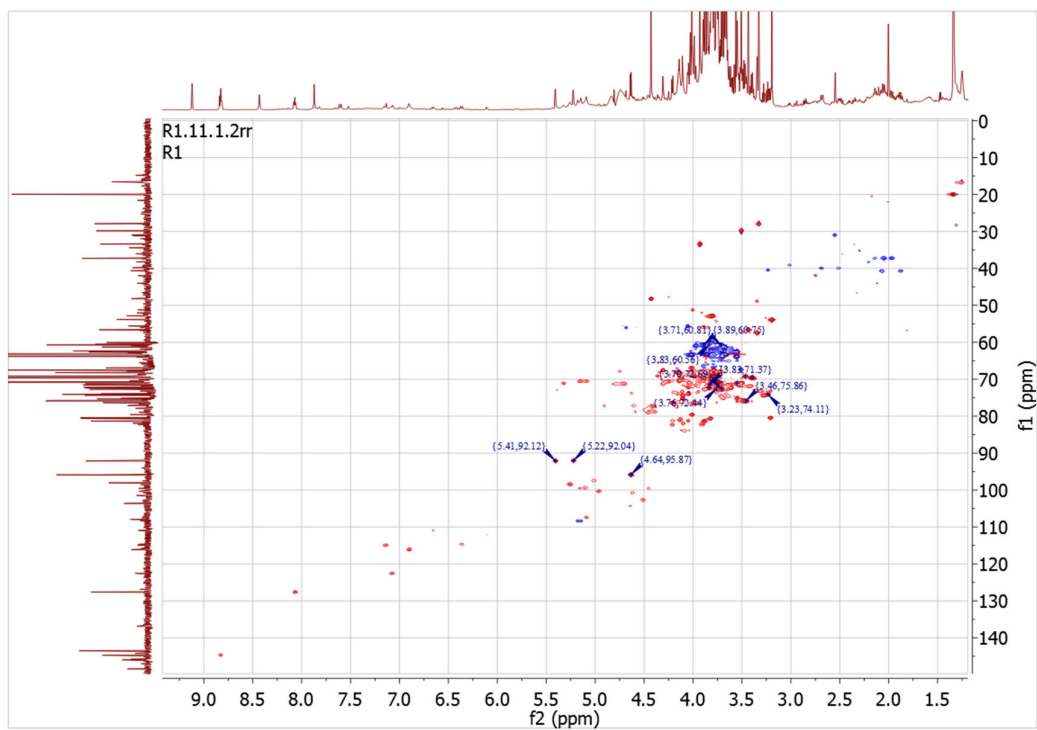

Figure S7. HSQC spectrum of lightly roasted A1 CS aqueous extracts.

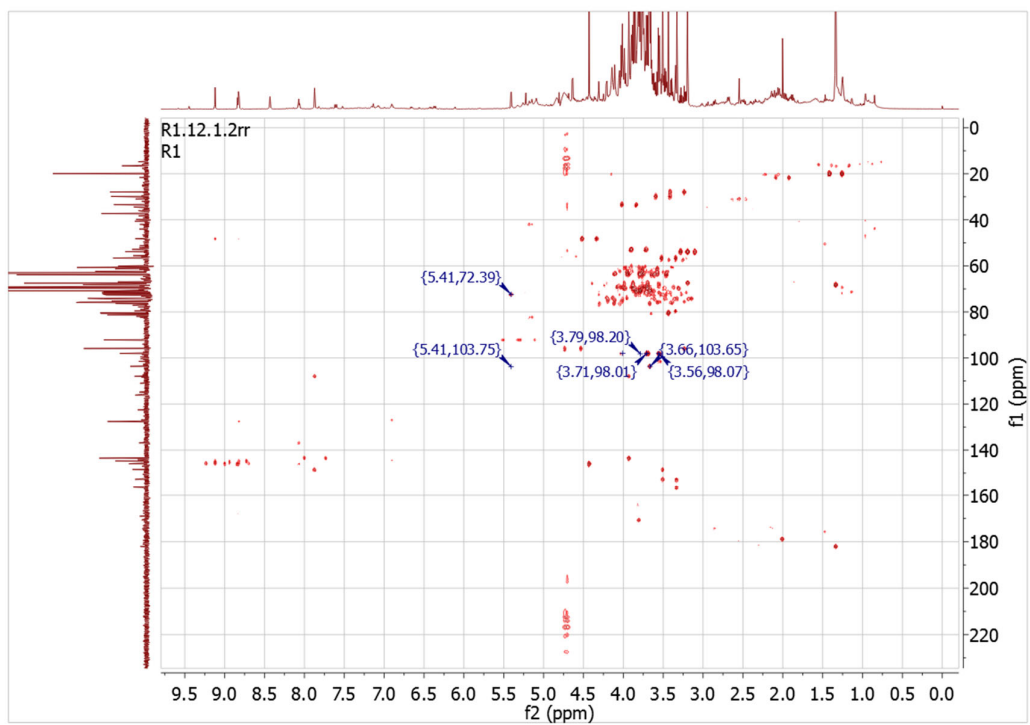

Figure S8. HMBC spectrum of lightly roasted A1 CS aqueous extracts.



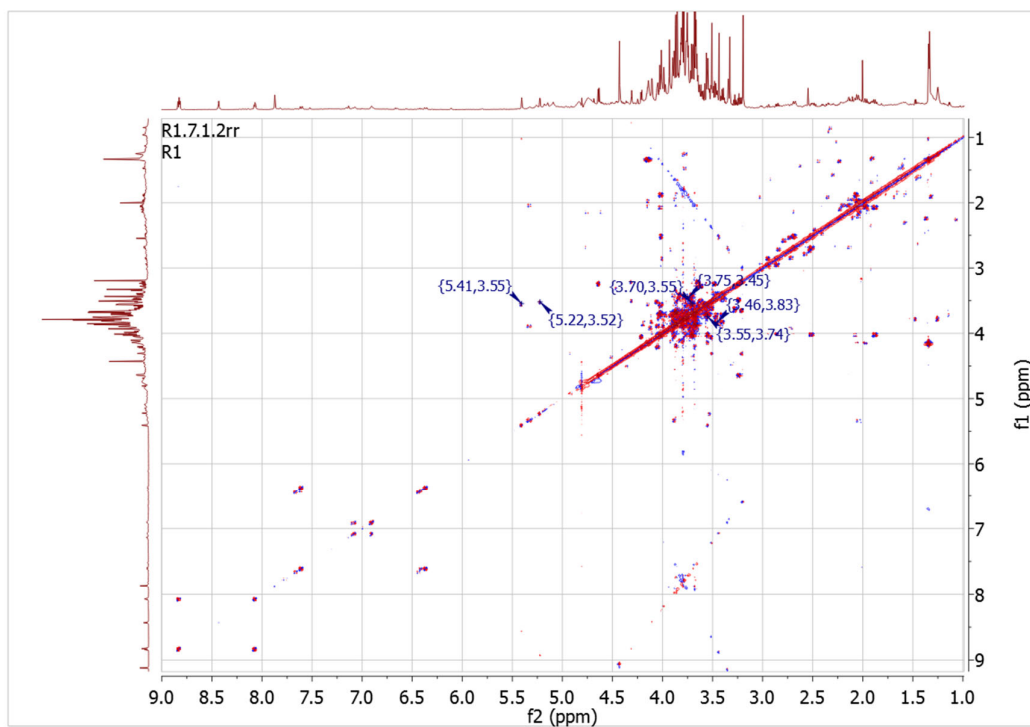

**Figure S9.**  $^1\text{H}$ - $^1\text{H}$  COSY spectrum of lightly roasted A1 CS aqueous extracts.

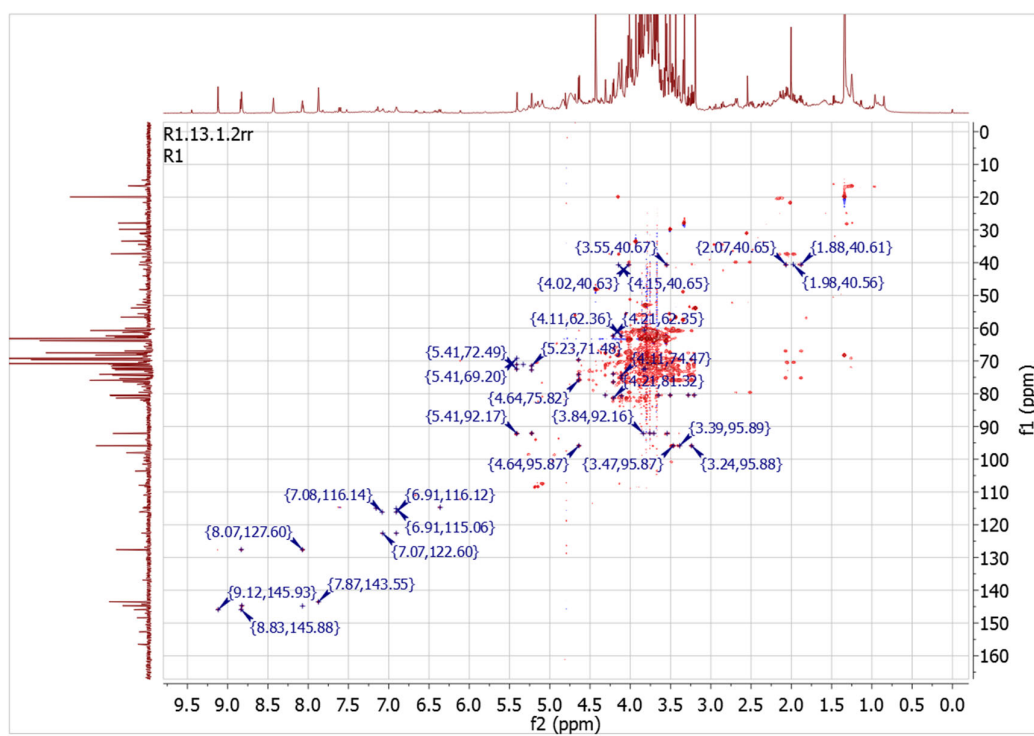

**Figure S10.** HSQC-TOCSY spectrum of lightly roasted A1 CS aqueous extracts.

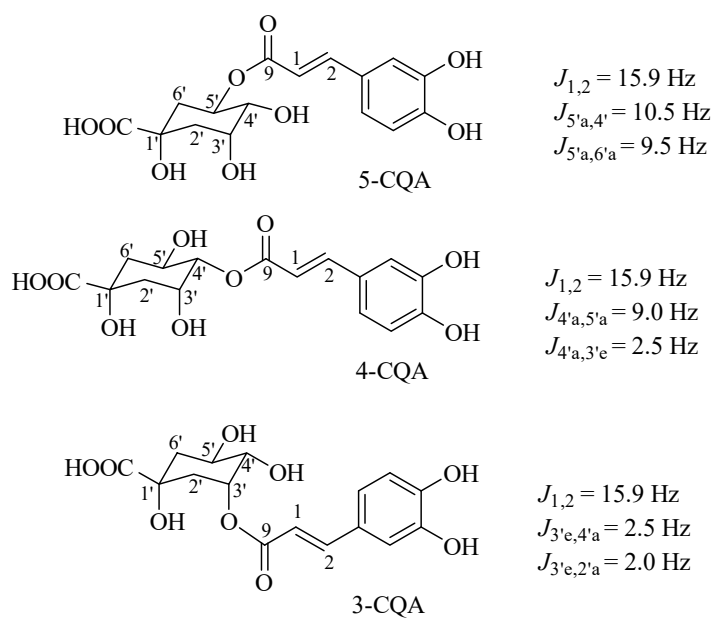

**Figure S11.** Characteristic coupling constants  $J$  for 3-CQA, 4-CQA, 5-CQA.

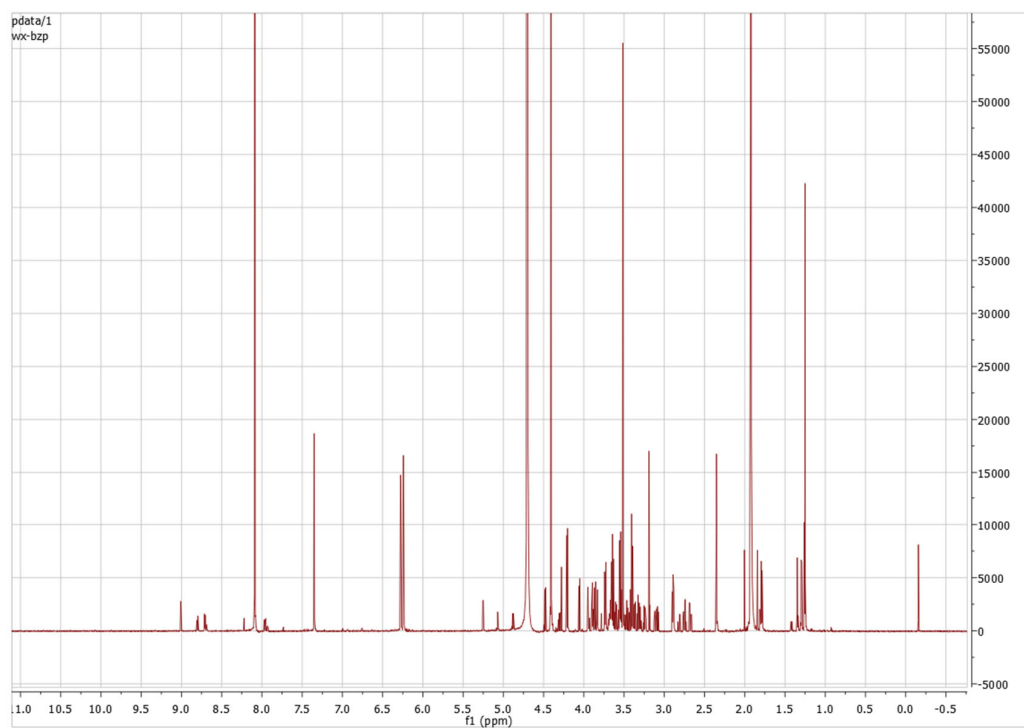

**Figure S12.**  $^1\text{H}$  NMR spectrum of the mixed standards.

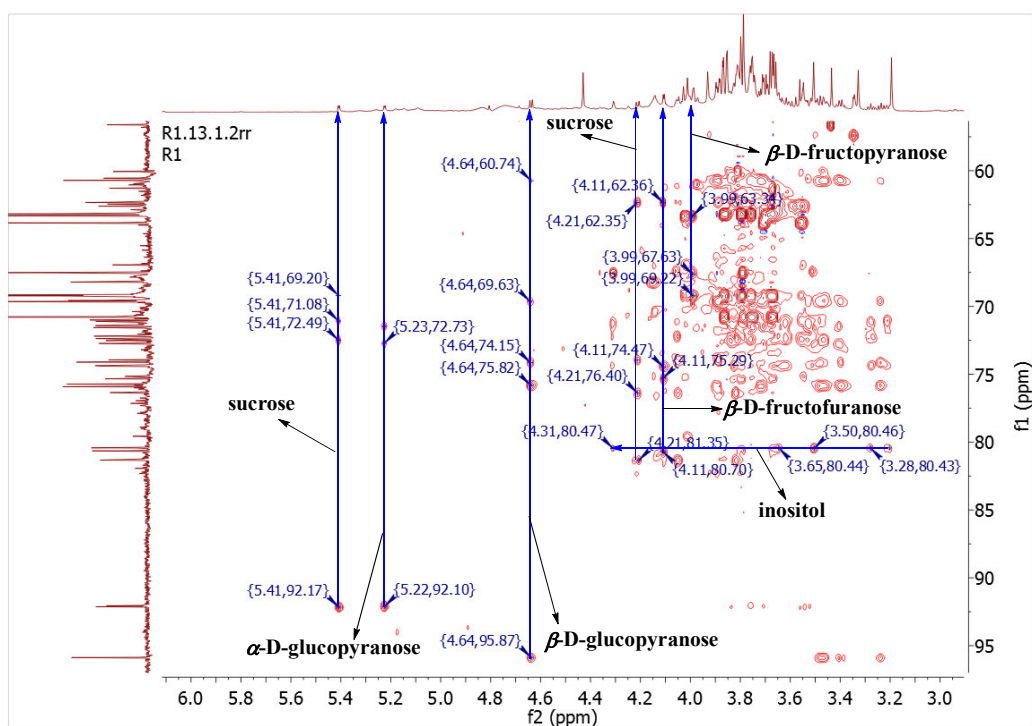

Figure S13. The HSQC-TOCSY correlations of carbohydrates from silverskin aqueous extract.

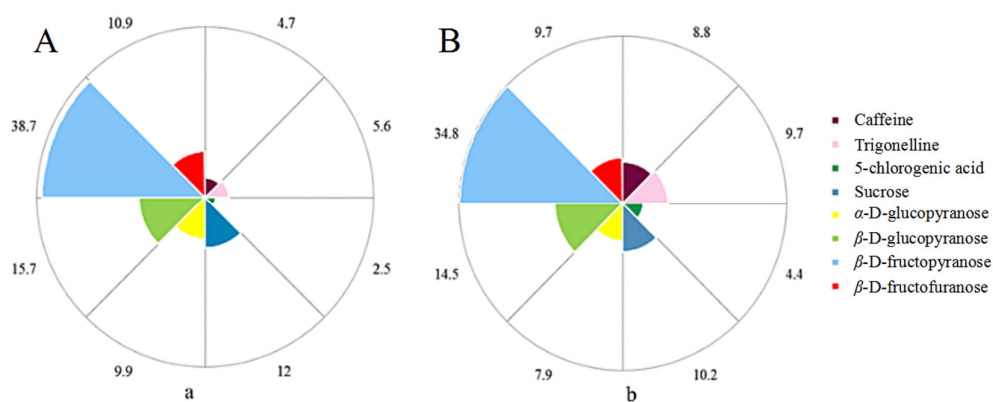

Figure S14. The relative content of different compounds before (A) and after roasting (B).
